# Supplementary material for: Impact of Subacute Exposure to T-2 Toxin and Zearalenone on the Pharmacokinetics of Midazolam as CYP3A Probe Drug in a Porcine Animal Model: A Pilot Study
Source: Front Pharmacol. 2019 Apr 16;10:399. doi: 10.3389/fphar.2019.00399 (PMC6492070; doi:10.3389/fphar.2019.00399)
Supplement: Supplementary file 2 [file Data_Sheet_2.xlsx]

## Sheet: Blad1
Data file: 170403-inhibitie-ZEA-MDZ-TB-DEX en DON-CM
Combinaties	[mycotoxine]-1	[mycotoxine]-2	[mycotoxine]-3						Moleculair gewicht	incubatietijd	[protein]
ZEA-DEX	1	10	100					OH-TB	286.347	10	0.25
ZEA-MDZ	0.5	5	20					OH-CM	162.14	5	0.1
ZEA-TB	0.1	1	10					OH-MDZ	341.77	5	0.1
DON-CM	1	10	50					DEX	257.37	5	0.1
T2-TB	1	10	50
T2-MDZ-pre	1	10	100
FB1-CM	0.1	1	5
ZEA-TB	[mycotoxine]=0	[mycotoxine]-1	[mycotoxine]-2	[mycotoxine]-3				[mycotoxine]=0	[mycotoxine]-1	[mycotoxine]-2	[mycotoxine]-3				[mycotoxine]=0	[mycotoxine]-1	[mycotoxine]-2	[mycotoxine]-3				[mycotoxine]=0	[mycotoxine]-1	[mycotoxine]-2	[mycotoxine]-3													T-2-TB	[mycotoxine]=0	[mycotoxine]-1	[mycotoxine]-2	[mycotoxine]-3		[mycotoxine]=0	[mycotoxine]-1	[mycotoxine]-2	[mycotoxine]-3
5	0.572	0.411	0.211	0.076				0.799031	0.574129	0.294747	0.106165	13.2867			0.817656	0.605792	0.312907	0.128515				0.817656	0.605792	0.312907	0.128515	5												5	0.572	0.498	0.499	0.184		0.799031	0.695659	0.697056	0.257031	32.1678
5	0.617	0.445	0.239	0.093				0.861891	0.621623	0.333861	0.129912	15.0729										1.62041	1.21158	0.631402	0.233749	10												5	0.617	0.478	0.411	0.164		0.861891	0.667721	0.574129	0.229093	26.5802
5	0.567	0.445	0.222	0.107				0.792046	0.621623	0.310113	0.149469	18.8713										6.33404	5.88517	3.28459	1.16269	50												5	0.567	0.511	0.533	0.128		0.792046	0.713819	0.744551	0.178804	22.575
10	1.096	0.922	0.474	0.166				1.53101	1.28795	0.662134	0.231886	15.146			1.62041	1.21158	0.631402	0.233749				14.2596	11.4188	6.64602	2.36263	100												10	1.096	1.032	0.755	0.285		1.53101	1.44161	1.05466	0.398118	26.0036
10	1.19	0.865	0.454	0.173				1.66232	1.20832	0.634196	0.241665	14.5378										26.4136	20.9289	12.3421	4.38955	200												10	1.19	1.104	0.798	0.26		1.66232	1.54218	1.11473	0.363196	21.8487
10	1.194	0.815	0.428	0.163				1.66791	1.13848	0.597876	0.227696	13.6516										44.2005	38.1076	22.2169	8.24082	400												10	1.194	1.123	0.703	0.266		1.66791	1.56873	0.982025	0.371577	22.2781
50	2.857	4.143	2.32	0.785				3.99096	5.78738	3.24082	1.09657	27.4764			6.33404	5.88517	3.28459	1.16269																				50	2.857	5.233	3.816	1.266		3.99096	7.31001	5.3306	1.76848	44.3122
50	5.422	4.335	2.234	0.861				7.57403	6.05559	3.12069	1.20274	15.8797																										50	5.422	4.423	3.626	1.166		7.57403	6.17852	5.06518	1.62879	21.505
50	5.324	4.161	2.5	0.851				7.43713	5.81253	3.49227	1.18877	15.9842																										50	5.324	5.054	3.983	1.201		7.43713	7.05997	5.56388	1.67768	22.5582
100	10.471	8.802	4.845	1.759				14.627	12.2956	6.76801	2.45716	16.7988			14.2596	11.4188	6.64602	2.36263																				100	10.471	10.584	7.251	1.92		14.627	14.7849	10.129	2.68206	18.3364
100	9.774	7.933	4.593	1.675				13.6534	11.0817	6.41599	2.33982	17.1373																										100	9.774	9.656	7.355	2.195		13.6534	13.4885	10.2742	3.06621	22.4575
100	10.379	7.788	4.835	1.64				14.4985	10.8791	6.75404	2.29093	15.8011																										100	10.379	9.709	7.364	2.265		14.4985	13.5626	10.2868	3.16399	21.8229
200	19.264	14.524	8.775	3.256				26.91	20.2887	12.2579	4.54833	16.902			26.4136	20.9289	12.3421	4.38955																				200	19.264	18.024	12.784	4.206		26.91	25.1778	17.8581	5.87539	21.8335
200	18.248	15.449	8.495	3.116				25.4908	21.5808	11.8667	4.35276	17.0758																										200	18.248	18.131	13.555	3.882		25.4908	25.3273	18.9351	5.42279	21.2736
200	19.214	14.974	9.236	3.055				26.8402	20.9173	12.9018	4.26755	15.8999																										200	19.214	18.002	12.754	4.333		26.8402	25.1471	17.8161	6.0528	22.5513
400	31.433	27.882	15.909	5.859				43.909	38.9485	22.2234	8.18448	18.6396			44.2005	38.1076	22.2169	8.24082																				400	31.433	25.218	23.832	7.863		43.909	35.2272	33.2911	10.9839	25.0151
400	32.648	26.285	15.565	5.978				45.6062	36.7177	21.7429	8.35071	18.3105																										400	32.648	31.246	23.125	8.019		45.6062	43.6477	32.3035	11.2018	24.562
400	30.844	27.673	16.239	5.861				43.0862	38.6566	22.6844	8.18727	19.0021																										400	30.844	29.688	24.2	6.917		43.0862	41.4714	33.8051	9.6624	22.4258
					100	200
DON-CM	[mycotoxine]=0	[mycotoxine]-1	[mycotoxine]-2	[mycotoxine]-3	[mycotoxine]-4	[mycotoxine]-5		[mycotoxine]=0	[mycotoxine]-1	[mycotoxine]-2	[mycotoxine]-3	[mycotoxine]-4	[mycotoxine]-5		[mycotoxine]=0	[mycotoxine]-1	[mycotoxine]-2	[mycotoxine]-3	[mycotoxine]-4	[mycotoxine]-5		[mycotoxine]=0	[mycotoxine]-1	[mycotoxine]-2	[mycotoxine]-3													FB1-CM	[mycotoxine]=0	[mycotoxine]-1	[mycotoxine]-2	[mycotoxine]-3		[mycotoxine]=0	[mycotoxine]-1	[mycotoxine]-2	[mycotoxine]-3
0.25	8.946	7.919	8.653	6.259	6.724	6.811		110.349	97.681	106.735	77.2049	82.9407	84.0138		111.266	99.5601	100.715	82.9078	89.47	74.2568		111.266	99.5601	100.715	82.9078	89.47	74.2568	0.25										0.25	5.44	5.422	4.545	2.624		67.1025	66.8805	56.0627	32.3671	48.2353
0.25	9.156	7.975	7.716	6.666	7.575			112.939	98.3718	95.177	82.2252	93.4378										126.964	135.895	126.952	100.185	106.217	78.5658	0.5										0.25	5.755	5.564	4.805	2.081		70.988	68.632	59.2698	25.6692	36.1599
0.25	8.959	8.32	8.126	7.239	7.461	5.229		110.509	102.627	100.234	89.2932	92.0316	64.4998									287.069	286.876	267.51	242.469	258.415	219.629	2										0.25	5.978	4.983	4.745	2.436		73.7387	61.4654	58.5297	30.0481	40.7494
0.5	10.226	11.375	10.342	9.766	8.828	6.088		126.138	140.311	127.569	120.464	108.894	75.0956		126.964	135.895	126.952	100.185	106.217	78.5658		310.053	317.368	279.623	279.836	281.374	251.634	5										0.5	9.492	9.744	8.707	3.797		117.084	120.192	107.401	46.8361	40.0021
0.5	9.847	10.488	10.248	8.24	8.351	6.383		121.463	129.37	126.409	101.641	103.01	78.7344									383.71	367.172	330.574	320.616	313.745	315.082	20										0.5	10.114	9.95	8.217	4.035		124.756	122.733	101.357	49.7718	39.8952
0.5	10.806	11.188	10.286	6.36	8.654	6.637		133.292	138.004	126.878	78.4507	106.747	81.8675									391.657	357.975	344.723	356.067	355.923	310.168	100										0.5	9.874	9.875	8.917	3.836		121.796	121.808	109.991	47.3171	38.8495
2	23.902	23.536	22.075	21.67	22.098	16.813		294.832	290.317	272.296	267.3	272.579	207.389		287.069	286.876	267.51	242.469	258.415	219.629																		2	20.974	19.12	18.986	10.745		258.715	235.846	234.193	132.54	51.2301
2	22.938	23.334	21.554	21.179	20.16	17.864		282.941	287.825	265.869	261.243	248.674	220.353																									2	20.352	19.552	18.637	10.749		251.042	241.174	229.888	132.589	52.8154
2	22.978	22.901	21.432	16.122	20.591	18.739		283.434	282.484	264.364	198.865	253.99	231.146																									2	20.931	20.156	17.833	10.937		258.184	248.625	219.97	134.908	52.2526
5	25.666	26.028	22.965	21.929	22.49	20.433		316.591	321.056	283.274	270.495	277.415	252.041		310.053	317.368	279.623	279.836	281.374	251.634																		5	26.473	24.402	21.069	16.039		326.545	300.999	259.887	197.841	60.5863
5	24.317	25.679	22.999	23.914	21.882	19.165		299.951	316.751	283.693	294.98	269.915	236.401																									5	24.98	23.93	22.572	16.99		308.129	295.177	278.426	209.572	68.0144
5	25.425	25.48	22.043	22.216	24.061	21.602		313.618	314.296	271.901	274.035	296.793	266.461																									5	25.193	24.881	21.632	17.271		310.756	306.908	266.831	213.038	68.5548
20	30.151	30.162	28.267	28.143	25.901	23.297		371.913	372.049	348.674	347.144	319.489	287.369		383.71	367.172	330.574	320.616	313.745	315.082																		20	28.668	26.571	26.524	23.165		353.62	327.754	327.174	285.741	80.8044
20	32.221	28.617	28.162	24.013	25.234	25.247		397.447	352.991	347.379	296.201	311.262	311.422																									20	26.902	27.061	23.723	22.993		331.837	333.798	292.624	283.619	85.4695
20	30.95	30.521	23.97	25.821	25.171	28.087		381.769	376.477	295.67	318.503	310.485	346.454																									20	28.875	28.696	25.371	22.92		356.174	353.966	312.952	282.719	79.3766
100	29.528	28.789	28.21	29.274	27.887	26.489		364.228	355.113	347.971	361.095	343.987	326.742		391.657	357.975	344.723	356.067	355.923	310.168																		100	30.593	28.628	23.722	24.798		377.365	353.127	292.611	305.884	81.0578
100	32.224	26.669	28.59	28.112	26.063	24.999		397.484	328.963	352.658	346.762	321.488	308.363																									100	29.889	29.077	26.519	24.965		368.681	358.665	327.112	307.944	83.5257
100	33.503	31.605	27.04	29.213	32.614	23.948		413.26	389.848	333.539	360.343	402.294	295.399																									100	28.781	28.746	29.156	24.72		355.014	354.582	359.64	304.922	85.89
ZEA-MDZ	[mycotoxine]=0	[mycotoxine]-1	[mycotoxine]-2	[mycotoxine]-3				[mycotoxine]=0	[mycotoxine]-1	[mycotoxine]-2	[mycotoxine]-3				[mycotoxine]=0	[mycotoxine]-1	[mycotoxine]-2	[mycotoxine]-3				[mycotoxine]=0	[mycotoxine]-1	[mycotoxine]-2	[mycotoxine]-3													T-2-MDZ	[mycotoxine]=0	[mycotoxine]-1	[mycotoxine]-2	[mycotoxine]-3		[mycotoxine]=0	[mycotoxine]-1	[mycotoxine]-2	[mycotoxine]-3
0.5	17.17	10.631	4.871	2.591				100.477	62.2114	28.5045	15.1622	15.0903			97.3481	64.638	27.6638	15.2695				97.3481	64.638	27.6638	15.2695	0.5												0.5	17.17	14.602	13.405	1.55		100.477	85.4493	78.4446	9.07043	9.02737
0.5	16.329	11.501	4.639	2.635				95.5555	67.3026	27.1469	15.4197	16.1369										271.311	191.448	75.306	40.3234	2												0.5	16.329	14.879	10.726	1.559		95.5555	87.0703	62.7674	9.12309	9.54743
0.5	16.407	11.005	4.672	2.602				96.0119	64.4	27.34	15.2266	15.8591										670.4	487.059	193.311	111.077	5												0.5	16.407	15.608	14.152	1.245		96.0119	91.3363	82.8159	7.2856	7.58822
2	45.526	33.15	12.476	6.879				266.413	193.99	73.0082	40.2551	15.11			271.311	191.448	75.306	40.3234				921.784	695.817	266.236	156.253	10												2	45.526	40.422	31.449	4.445		266.413	236.545	184.036	26.0116	9.76365
2	47.841	32.802	13.044	6.73				279.96	191.954	76.332	39.3832	14.0674										1609.16	1237.86	502.348	305.166	20												2	47.841	39.702	30.843	3.544		279.96	232.332	180.49	20.7391	7.40787
2	45.722	32.195	13.086	7.063				267.56	188.402	76.5778	41.3319	15.4477										1711.78	1494.82	780.845	458.726	50	26.7981											2	45.722	38.753	30.196	3.726		267.56	226.778	176.704	21.8041	8.14925
5	119.934	80.2	32.841	19.032				701.84	469.321	192.182	111.373	15.8687			670.4	487.059	193.311	111.077																				5	119.934	101.989	83.485	13.613		701.84	596.828	488.545	79.6618	11.3504
5	104.815	83.057	33.069	18.579				613.366	486.04	193.516	108.722	17.7255																										5	104.815	101.736	92.689	13.064		613.366	595.348	542.406	76.4491	12.4639
5	118.935	86.436	33.192	19.333				695.994	505.814	194.236	113.135	16.2551																										5	118.935	105.212	83.153	13.986		695.994	615.689	486.602	81.8445	11.7594
10	159.875	118.734	46.335	27.774				935.571	694.818	271.147	162.53	17.3723			921.784	695.817	266.236	156.253																				10	159.875	123.269	107.54	20.648		935.571	721.356	629.312	120.83	12.9151
10	156.064	121.622	44.858	25.462				913.269	711.718	262.504	149.001	16.3151																										10	156.064	127.986	110.229	17.381		913.269	748.96	645.048	101.712	11.1371
10	156.618	116.358	45.294	26.868				916.511	680.914	265.055	157.229	17.1551																										10	156.618	130.354	99.626	21.593		916.511	762.817	583	126.36	13.787
20	278.566	225.65	87.27	54.09				1630.14	1320.48	510.694	316.529	19.4173			1609.16	1237.86	502.348	305.166																				20	278.566	182.04	168.947	44.091		1630.14	1065.28	988.659	258.016	15.8278
20	273.297	205.003	83.872	51.134				1599.3	1199.65	490.81	299.23	18.71																										20	273.297	193.851	155.314	43.199		1599.3	1134.39	908.88	252.796	15.8066
20	273.08	203.943	86.389	51.221				1598.03	1193.45	505.539	299.74	18.7568																										20	273.08	200.794	157.86	43.285		1598.03	1175.02	923.779	253.299	15.8507
50	331.018	233.835	141.277	78.257				1937.08	1368.38	826.737	457.951	23.6413			1711.78	1494.82	780.845	458.726																				50	331.018	230.956	197.743	62.89		1937.08	1351.53	1157.17	368.025	18.999
50	268.177	261.192	127.926	80.177				1569.34	1528.47	748.609	469.187	29.897																										50	268.177	224.357	197.335	69.461		1569.34	1312.91	1154.78	406.478	25.9012
50	278.359	271.301	131.101	76.734				1628.93	1587.62	767.188	449.039	27.5666																										50	278.359	226.361	187.417	65.461		1628.93	1324.64	1096.74	383.07	23.5168
ZEA-DEX	[mycotoxine]=0	[mycotoxine]-1	[mycotoxine]-2	[mycotoxine]-3				[mycotoxine]=0	[mycotoxine]-1	[mycotoxine]-2	[mycotoxine]-3				[mycotoxine]=0	[mycotoxine]-1	[mycotoxine]-2	[mycotoxine]-3				[mycotoxine]=0	[mycotoxine]-1	[mycotoxine]-2	[mycotoxine]-3
0.1	13.736	12.415	11.16	5.106				106.741	96.4759	86.7234	39.6783	37.1724			93.5126	94.4503	93.0308	46.2602				93.5126	94.4503	93.0308	46.2602	0.1
0.1	9.577	11.92	12.91	6.098				74.422	92.6293	100.322	47.387	63.6734										336.553	318.996	268.765	144.062	0.5
0.1	12.788	12.128	11.845	6.655				99.3744	94.2456	92.0465	51.7154	52.041										735.476	730.041	679.227	285.06	1
0.5	41.92	40.861	24.937	17.938				325.757	317.527	193.783	139.395	42.791			336.553	318.996	268.765	144.062				1255.16	1299.56	1231.89	473.282	5
0.5	45.983	42.288	40.817	19.115				357.33	328.616	317.185	148.541	41.5697										1739.69	1763.96	1598.85	576.221	20
0.5	42.025	40.001	38.004	18.563				326.573	310.844	295.326	144.251	44.1713										1878.02	1962.25	1752.83	600.184	100
1	88.67	97.289	90.005	38.82				689.047	756.024	699.421	301.667	43.7803			735.476	730.041	679.227	285.06
1	101.162	92.162	84.904	37.027				786.121	716.183	659.782	287.734	36.6017
1	94.102	92.385	87.31	34.202				731.258	717.916	678.478	265.781	36.3457
5	173.457	187.406	150.657	66.332				1347.92	1456.32	1170.74	515.46	38.2412			1255.16	1299.56	1231.89	473.282
5	171.581	165.804	155.437	62.199				1333.34	1288.45	1207.89	483.343	36.2505
5	139.523	148.491	169.483	54.182				1084.22	1153.91	1317.04	421.044	38.8337
20	227.396	213.259	206.001	78.259				1767.07	1657.22	1600.82	608.144	34.4153			1739.69	1763.96	1598.85	576.221
20	222.02	242.029	212.54	72.164				1725.3	1880.79	1651.63	560.78	32.5034
20	222.199	225.699	198.704	72.03				1726.69	1753.89	1544.11	559.739	32.4169
100	241.292	249.001	227.258	80.488				1875.06	1934.97	1766	625.465	33.3571			1878.02	1962.25	1752.83	600.184
100	248.064	259.227	219.868	76.546				1927.68	2014.43	1708.58	594.832	30.8574
100	235.664	249.307	229.561	74.67				1831.32	1937.34	1783.9	580.254	31.6849
